# Supplementary material
Source: publisher figshare collection journal article supplement (https://plos.figshare.com/articles/dataset/_/6141347)
Supplement: Supplementary file [file 1]

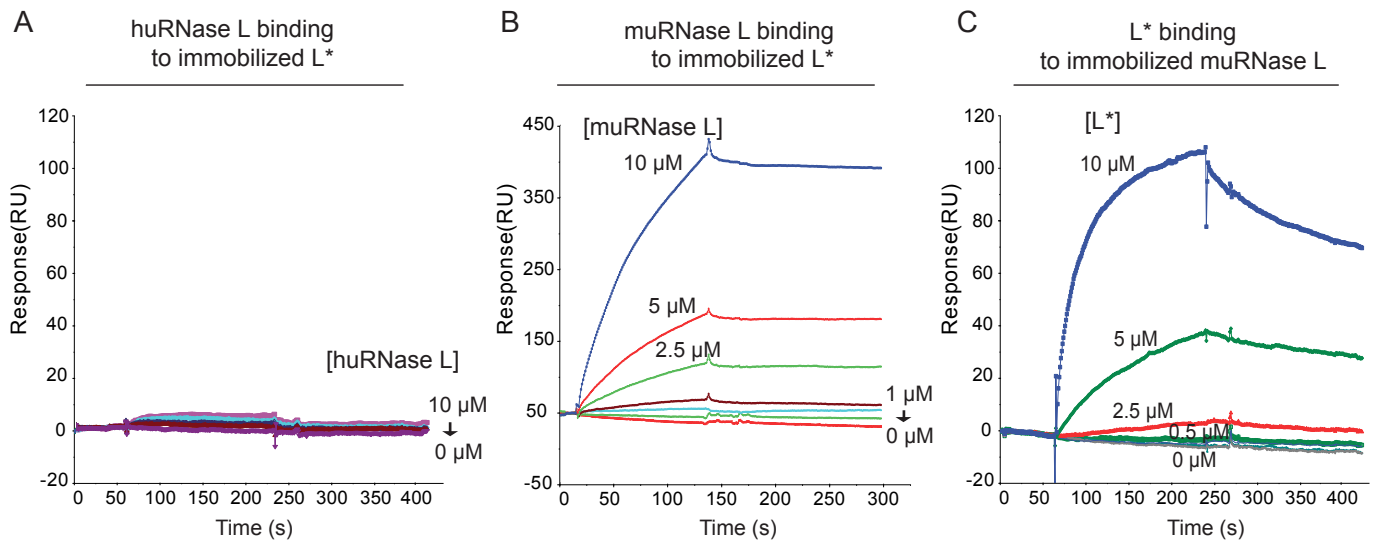

### S3 Fig. Mouse RNase L but not human RNase L binds to L\*.

Surface plasmon resonance (SPR) experiments were performed using Biacore technology with purified recombinant L\*, mouse RNase L and human RNase L.

A. His6-L\* was immobilized on Ni-NTA chips and human RNase L was injected at the indicated concentrations.

B. His6-L\* was immobilized on Ni-NTA chips and mouse RNase L was injected at the indicated concentrations.

C. GST-mouse RNase L was immobilized on anti-GST CM5 sensor chip and L\* was injected at the indicated concentrations.

RU: response units
