# Supplementary material
Source: publisher figshare collection journal article supplement (https://plos.figshare.com/articles/dataset/_/6141347)
Supplement: Supplementary file [file 1]

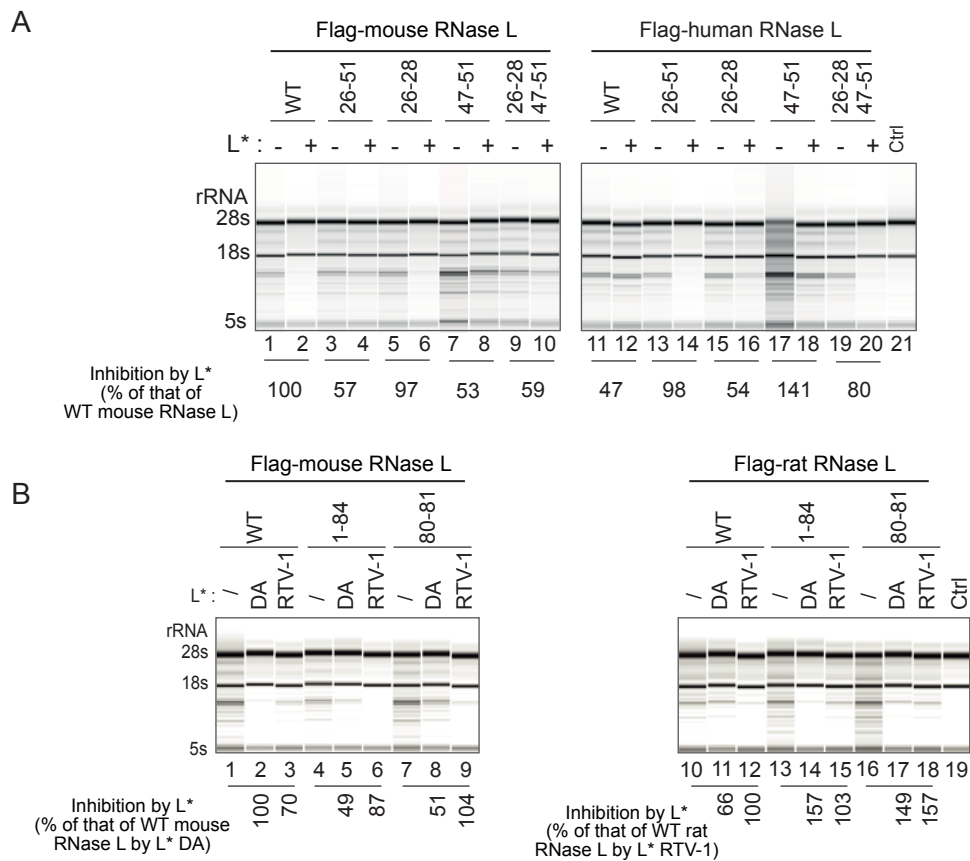

## S2 Fig. Inhibition of chimeric RNase L by L\*

Analysis of RNase L-mediated RNA degradation in HeLa-M cells overexpressing indicated Flag-RNase L chimera and HA-L\*. RNA samples extracted 7 hours after polyI:C transfection were analyzed by RNA chips and quantified.

A. Inhibition of mouse RNase L carrying indicated human RNase L residues (left) and of human RNase L carrying indicated mouse RNase L residues (right) by L\*<sub>DA</sub>. Values under the lanes indicate the extent of rRNA degradation inhibition compared to that of WT mouse RNase L.

B. Inhibition of mouse RNase L carrying indicated rat RNase L residues (left) and of rat RNase L carrying indicated mouse RNase L residues (right) by L\*<sub>DA</sub> and L\*<sub>RTV-1</sub>. Values under the lanes indicate the extent of rRNA degradation inhibition by L\* compared to that mediated by L\*<sub>DA</sub> on mouse RNase L (left panel) or compared to that mediated by L\*<sub>RTV-1</sub> on WT rat RNase L (right panel).
